# Supplementary material
Source: PubMed Central journal article supplement (PMC9248074)

# The Impact of Persistent Smoking After Surgery on Long-term Outcomes After Stage I Non-small Cell Lung Cancer Resection

*Brendan T. Heiden, MD, MPHS; Daniel B. Eaton Jr. MPH; Su-Hsin Chang, PhD, SM; Yan Yan, MD, PhD; Martin W. Schoen, MD, MPH; Li-Shiun Chen, MD, MPH, ScD; Nina Smock, BA; Mayank R. Patel, MD; Daniel Kreisel, MD, PhD; Ruben G. Nava, MD; Bryan F. Meyers, MD, MPH; Benjamin D. Kozower, MD, MPH; and Varun Puri, MD, MSCI*

CHEST 2022; 161(6):1687-1696

*Online supplements are not copyedited prior to posting and the author(s) take full responsibility for the accuracy of all data.*

© 2022 AMERICAN COLLEGE OF CHEST PHYSICIANS. Reproduction of this article is prohibited without written permission from the American College of Chest Physicians. See online for more details. DOI: 10.1016/j.chest.2021.12.634

**e-Table 1:** Patient demographics, treatment characteristics, and outcomes among individuals who persistently smoke and individuals who relapse

| Characteristics                                                            | Patients smoking at time of surgery (i.e., individuals who currently smoke) |                                                         |         | Patients not smoking at time of surgery (i.e., individuals who formerly smoked) |                                                         |         |
|----------------------------------------------------------------------------|-----------------------------------------------------------------------------|---------------------------------------------------------|---------|---------------------------------------------------------------------------------|---------------------------------------------------------|---------|
|                                                                            | Patients smoking at 1 year after surgery ("continued smoking")<br>N=2,648   | Patients not smoking at 1 year after surgery<br>N=1,914 | P-Value | Patients smoking at 1 year after surgery ("relapsed smoking")<br>N=573          | Patients not smoking at 1 year after surgery<br>N=2,354 | P-Value |
| <b>Demographics</b>                                                        |                                                                             |                                                         |         |                                                                                 |                                                         |         |
| Age (SD)                                                                   | 64.53 (7.12)                                                                | 67.03 (7.53)                                            | <0.001  | 66.56 (7.23)                                                                    | 69.72 (7.73)                                            | <0.001  |
| Sex (%)                                                                    |                                                                             |                                                         | 0.577   |                                                                                 |                                                         | 0.425   |
| Male                                                                       | 2,542 (96)                                                                  | 1,831 (95.66)                                           |         | 548 (95.64)                                                                     | 2,268 (96.35)                                           |         |
| Female                                                                     | 106 (4)                                                                     | 83 (4.34)                                               |         | 25 (4.36)                                                                       | 86 (3.65)                                               |         |
| Race (%)                                                                   |                                                                             |                                                         | 0.389   |                                                                                 |                                                         | 0.432   |
| White                                                                      | 2,145 (81)                                                                  | 1,534 (80.15)                                           |         | 495 (86.39)                                                                     | 1,994 (84.71)                                           |         |
| Black                                                                      | 449 (16.96)                                                                 | 326 (17.03)                                             |         | 65 (11.34)                                                                      | 314 (13.34)                                             |         |
| Other                                                                      | 31 (1.17)                                                                   | 32 (1.67)                                               |         | 10 (1.75)                                                                       | 29 (1.23)                                               |         |
| Unknown                                                                    | 23 (0.87)                                                                   | 22 (1.15)                                               |         | 3 (0.52)                                                                        | 17 (0.72)                                               |         |
| BMI (SD)                                                                   | 25.60 (5.13)                                                                | 27.15 (5.28)                                            | <0.001  | 27.06 (5.71)                                                                    | 28.43 (5.34)                                            | <0.001  |
| Area Deprivation Index (SD)                                                | 54.45 (15.13)                                                               | 53.57 (14.92)                                           | 0.053   | 56.66 (14.77)                                                                   | 54.5 (14.78)                                            | 0.002   |
| Charlson/Deyo score (SD)                                                   | 6.48 (2.16)                                                                 | 6.69 (2.15)                                             | 0.001   | 6.85 (2.13)                                                                     | 7.21 (2.21)                                             | 0.001   |
| Smoking cessation pharmacotherapy prescribed after surgery (within 1 year) | 1,361 (51.40)                                                               | 643 (33.59)                                             | <0.001  | 268 (46.77)                                                                     | 394 (16.74)                                             | <0.001  |
| Post-operative appointments (in 1 year after surgery)                      |                                                                             |                                                         |         |                                                                                 |                                                         |         |
| Cardiothoracic surgeon (>1 visit)                                          | 1,601 (60.46)                                                               | 1,158 (60.50)                                           | 0.978   | 366 (63.87)                                                                     | 1,484 (63.04)                                           | 0.7109  |
| Oncologist                                                                 | 1,155 (43.62)                                                               | 834 (43.57)                                             | 0.976   | 240 (41.88)                                                                     | 1,072 (45.54)                                           | 0.115   |
| Primary care provider                                                      | 2,478 (93.58)                                                               | 1,795 (93.78)                                           | 0.7816  | 544 (94.94)                                                                     | 2,214 (94.05)                                           | 0.415   |



| <b>Treatment Characteristics</b> |               |               |       |               |               |       |
|----------------------------------|---------------|---------------|-------|---------------|---------------|-------|
| Wait time to surgery, days       |               |               |       |               |               |       |
| Median (IQR)                     | 65 (41,97.5)  | 59 (38,91)    | 0.764 | 63 (42,92)    | 61 (41,93)    | 0.226 |
| >12 weeks (%)                    | 871 (32.89)   | 556 (29.05)   | 0.006 | 163 (28.45)   | 692 (29.4)    | 0.654 |
| Tumor size, mm (SD)              | 22.46 (10.51) | 23.04 (10.45) | 0.072 | 22.99 (10.78) | 23.44 (10.69) | 0.375 |
| Resection (%)                    |               |               | 0.193 |               |               | 0.916 |
| Lobectomy                        | 1,853 (70.06) | 1,383 (72.41) |       | 409 (71.5)    | 1,650 (70.24) |       |
| Wedge                            | 599 (22.65)   | 382 (20)      |       | 123 (21.5)    | 533 (22.69)   |       |
| Segment                          | 160 (6.05)    | 118 (6.18)    |       | 33 (5.77)     | 133 (5.66)    |       |
| Pneumonectomy                    | 33 (1.25)     | 27 (1.41)     |       | 7 (1.22)      | 33 (1.4)      |       |
| Surgical approach (%)            |               |               | 0.214 |               |               | 0.133 |
| VATS                             | 1,058 (41.87) | 727 (39.99)   |       | 221 (39.75)   | 982 (43.26)   |       |
| Thoracotomy                      | 1,469 (58.13) | 1,091 (60.01) |       | 335 (60.25)   | 1,288 (56.74) |       |
| Histology (%)                    |               |               | 0.132 |               |               | 0.176 |
| Adenocarcinoma                   | 1,357 (51.27) | 1,032 (53.95) |       | 285 (49.74)   | 1,261 (53.59) |       |
| Squamous cell                    | 940 (35.51)   | 626 (32.72)   |       | 208 (36.3)    | 815 (34.64)   |       |
| Other                            | 350 (13.22)   | 255 (13.33)   |       | 80 (13.96)    | 277 (11.77)   |       |
| Grade (%)                        |               |               | 0.009 |               |               | 0.577 |
| I                                | 234 (9.53)    | 225 (12.61)   |       | 80 (14.73)    | 320 (14.63)   |       |
| II                               | 1,308 (53.28) | 942 (52.8)    |       | 295 (54.33)   | 1,143 (52.26) |       |
| III                              | 589 (33.02)   | 589 (33.02)   |       | 158 (29.1)    | 694 (31.73)   |       |
| IV                               | 34 (1.38)     | 28 (1.57)     |       | 10 (1.84)     | 30 (1.37)     |       |
| Pathologic stage (%)             |               |               | 0.277 |               |               | 0.054 |
| I                                | 2,255 (88.26) | 1,621 (88.00) |       | 471 (85.33)   | 2,026 (88.86) |       |
| II                               | 192 (7.51)    | 156 (8.47)    |       | 55 (9.96)     | 162 (7.11)    |       |
| III                              | 108 (4.23)    | 65 (3.53)     |       | 26 (4.71)     | 92 (4.04)     |       |



| <b>Outcomes</b>             |            |            |       |           |            |       |
|-----------------------------|------------|------------|-------|-----------|------------|-------|
| Length of stay, days (IQR)  | 6 (4,10)   | 7 (4,10)   | 0.018 | 7 (4,10)  | 7 (4,9)    | 0.020 |
| Complications (%)           |            |            |       |           |            |       |
| Pneumonia                   | 148 (5.59) | 110 (5.75) | 0.820 | 42 (7.33) | 111 (4.72) | 0.012 |
| MI                          | 18 (0.68)  | 17 (0.89)  | 0.426 | 2 (0.35)  | 30 (1.27)  | 0.056 |
| Empyema                     | 23 (0.87)  | 18 (0.94)  | 0.800 | 7 (1.22)  | 14 (0.59)  | 0.111 |
| Renal Failure               | 22 (0.83)  | 26 (1.36)  | 0.085 | 7 (1.22)  | 27 (1.15)  | 0.881 |
| Respiratory/Cardiac Failure | 104 (3.93) | 85 (4.44)  | 0.390 | 25 (4.36) | 86 (3.65)  | 0.425 |
| Stroke                      | 3 (0.11)   | 5 (0.26)   | 0.239 | 1 (0.17)  | 9 (0.38)   | 0.445 |
| 30-D readmission (%)        | 193 (7.29) | 148 (7.74) | 0.573 | 55 (9.62) | 171 (7.26) | 0.059 |

Data are presented as No. (%), mean (standard deviation), or median (interquartile range). ADI, area deprivation index; BMI, body mass index; VATS, video-assisted thoracoscopic surgery

**e-Table 2:** Factors independently associated with smoking relapse at 1 year after surgery (n=2927)

| Variable                                                | Odds Ratio | 95% Wald Confidence Limits |       | P-value |
|---------------------------------------------------------|------------|----------------------------|-------|---------|
| Quit smoking between diagnosis and surgery (yes vs. no) | 4.729      | 3.711                      | 6.025 | <.0001  |
| Age                                                     | 0.951      | 0.935                      | 0.968 | <.0001  |
| Sex (female vs. male)                                   | 0.593      | 0.318                      | 1.106 | 0.1001  |
| Race (reference = white)                                |            |                            |       |         |
| Black                                                   | 0.660      | 0.465                      | 0.937 | 0.0200  |
| Other                                                   | 1.941      | 0.862                      | 4.369 | 0.1094  |
| Unknown                                                 | 0.831      | 0.175                      | 3.942 | 0.8158  |
| BMI                                                     | 0.962      | 0.941                      | 0.982 | 0.0004  |
| Charlson/Deyo score                                     | 1.060      | 1.000                      | 1.125 | 0.0513  |
| Area Deprivation Index                                  | 1.013      | 1.005                      | 1.021 | 0.0008  |
| Delayed surgery >12 weeks (yes vs. no)                  | 0.776      | 0.604                      | 0.996 | 0.0468  |
| Resection type (reference = lobectomy)                  |            |                            |       |         |
| Pneumonectomy                                           | 0.579      | 0.215                      | 1.560 | 0.2800  |
| Segmentectomy                                           | 0.769      | 0.444                      | 1.331 | 0.3479  |
| Wedge                                                   | 1.021      | 0.770                      | 1.354 | 0.8852  |
| Surgical approach (VATS vs. thoracotomy)                | 1.019      | 0.810                      | 1.282 | 0.8698  |
| Tumor size (reference ≤ 10 mm)                          |            |                            |       |         |
| 11-20                                                   | 0.819      | 0.547                      | 1.225 | 0.3316  |
| 21-30                                                   | 0.804      | 0.547                      | 1.226 | 0.3113  |
| 31-40                                                   | 0.771      | 0.481                      | 1.236 | 0.2803  |
| 41-50                                                   | 0.793      | 0.450                      | 1.398 | 0.4229  |
| Unknown                                                 | 1.484      | 0.718                      | 3.069 | 0.2863  |
| Pathologic stage (reference = I)                        |            |                            |       |         |
| II                                                      | 1.793      | 1.216                      | 2.645 | 0.0032  |
| III                                                     | 0.989      | 0.550                      | 1.781 | 0.9719  |
| Major complication (yes vs. no)                         | 0.990      | 0.684                      | 1.432 | 0.9567  |
| Readmission (yes vs. no)                                | 1.403      | 0.940                      | 2.093 | 0.0974  |
| Post-operative appointments (in 1 year after surgery)   |            |                            |       |         |
| Cardiothoracic surgeon (>1 visit)                       | 0.864      | 0.685                      | 1.091 | 0.2193  |
| Oncologist                                              | 0.811      | 0.647                      | 1.018 | 0.0705  |
| Primary care provider                                   | 1.128      | 0.694                      | 1.836 | 0.6267  |

ADI, area deprivation index; BMI, body mass index; VATS, video-assisted thoracoscopic surgery

Multivariable model controlling for all covariates displayed in the table.

**e-Table 3:** Multivariable cox proportional hazards model for overall survival

| Variable                                         | Hazard Ratio | 95% Wald Confidence Limits |       | P-value |
|--------------------------------------------------|--------------|----------------------------|-------|---------|
| Smoking at 1 year after surgery (reference = no) | 1.291        | 1.197                      | 1.392 | <.0001  |
| Age, y                                           | 1.023        | 1.018                      | 1.029 | <.0001  |
| Female vs male, sex                              | 0.681        | 0.540                      | 0.859 | 0.0012  |
| Race (reference = white)                         |              |                            |       |         |
| Black                                            | 0.893        | 0.806                      | 0.989 | 0.0303  |
| Other                                            | 0.746        | 0.528                      | 1.052 | 0.0950  |
| Unknown                                          | 0.948        | 0.637                      | 1.409 | 0.7912  |
| BMI                                              | 0.981        | 0.974                      | 0.988 | <.0001  |
| Charlson/Deyo score                              | 1.088        | 1.068                      | 1.108 | <.0001  |
| Area Deprivation Index                           | 1.001        | 0.998                      | 1.003 | 0.6679  |
| Annual hospital volume, y                        | 1.000        | 0.999                      | 1.001 | 0.5875  |
| Surgical year                                    | 0.976        | 0.961                      | 0.990 | 0.0009  |
| Type of operation (reference = lobectomy)        |              |                            |       |         |
| Pneumonectomy                                    | 0.901        | 0.671                      | 1.209 | 0.4867  |
| Segmentectomy                                    | 1.081        | 0.914                      | 1.278 | 0.3643  |
| Wedge                                            | 1.387        | 1.268                      | 1.517 | <.0001  |
| Incision type (reference = thoracotomy)          |              |                            |       |         |
| VATS                                             | 0.983        | 0.907                      | 1.065 | 0.6724  |
| Histology (reference = adenocarcinoma)           |              |                            |       |         |
| Squamous cell carcinoma                          | 1.087        | 1.004                      | 1.178 | 0.0403  |
| Other                                            | 1.155        | 1.025                      | 1.301 | 0.0181  |
| Grade (reference = I)                            |              |                            |       |         |
| II                                               | 1.321        | 1.162                      | 1.502 | <.0001  |
| III                                              | 1.420        | 1.241                      | 1.624 | <.0001  |
| IV                                               | 1.781        | 1.315                      | 2.413 | 0.0002  |
| Tumor size (reference = 0-10mm)                  |              |                            |       |         |
| 11-20mm                                          | 0.879        | 0.772                      | 1.001 | 0.0522  |
| 21-30mm                                          | 0.969        | 0.847                      | 1.109 | 0.6493  |
| 31-40mm                                          | 1.103        | 0.950                      | 1.281 | 0.1990  |
| 40+ mm                                           | 1.152        | 0.964                      | 1.377 | 0.1205  |
| Unknown                                          | 0.539        | 0.382                      | 0.762 | 0.0005  |
| Lymph node collection (reference <10)            | 0.908        | 0.839                      | 0.983 | 0.0171  |
| Major complication (reference = no)              | 1.180        | 1.045                      | 1.331 | 0.0074  |
| Length of stay                                   | 1.014        | 1.008                      | 1.020 | <.0001  |
| 30-day readmission (reference = no)              | 1.002        | 0.875                      | 1.148 | 0.9712  |
| Pathologic stage (reference = I)                 |              |                            |       |         |
| II                                               | 1.309        | 1.146                      | 1.496 | <.0001  |
| III                                              | 2.178        | 1.850                      | 2.564 | <.0001  |

ADI, area deprivation index; BMI, body mass index; VATS, video-assisted thoracoscopic surgery

Multivariable model controlling for all covariates displayed in the table.

**e-Table 4:** Multivariable competing risk model for disease-free survival

| Variable                                         | Hazard Ratio | 95% Wald Confidence Limits |       | P-value |
|--------------------------------------------------|--------------|----------------------------|-------|---------|
| Smoking at 1 year after surgery (reference = no) | 0.989        | 0.884                      | 1.106 | 0.8441  |
| Age, y                                           | 0.991        | 0.983                      | 0.999 | 0.0265  |
| Female vs male, sex                              | 0.789        | 0.586                      | 1.063 | 0.1191  |
| Race (reference = white)                         |              |                            |       |         |
| Black                                            | 1.083        | 0.939                      | 1.249 | 0.2721  |
| Other                                            | 0.803        | 0.503                      | 1.282 | 0.3580  |
| Unknown                                          | 0.682        | 0.344                      | 1.353 | 0.2731  |
| BMI                                              | 0.997        | 0.986                      | 1.007 | 0.5481  |
| Charlson/Deyo score                              | 1.018        | 0.990                      | 1.046 | 0.2046  |
| Area Deprivation Index                           | 1.000        | 0.997                      | 1.003 | 0.9941  |
| Annual hospital volume, y                        | 1.001        | 1.000                      | 1.002 | 0.2909  |
| Surgical year                                    | 0.990        | 0.971                      | 1.009 | 0.2951  |
| Type of operation (reference = lobectomy)        |              |                            |       |         |
| Pneumonectomy                                    | 0.875        | 0.559                      | 1.370 | 0.5591  |
| Segmentectomy                                    | 1.224        | 0.966                      | 1.553 | 0.0947  |
| Wedge                                            | 1.395        | 1.224                      | 1.589 | <.0001  |
| Incision type (reference = thoracotomy)          |              |                            |       |         |
| VATS                                             | 0.965        | 0.859                      | 1.083 | 0.5436  |
| Histology (reference = adenocarcinoma)           |              |                            |       |         |
| Squamous cell carcinoma                          | 0.837        | 0.742                      | 0.945 | 0.0039  |
| Other                                            | 1.049        | 0.882                      | 1.247 | 0.5884  |
| Grade (reference = I)                            |              |                            |       |         |
| II                                               | 1.435        | 1.190                      | 1.731 | 0.0002  |
| III                                              | 1.552        | 1.273                      | 1.893 | <.0001  |
| IV                                               | 1.474        | 0.900                      | 2.415 | 0.1232  |
| Tumor size (reference = 0-10mm)                  |              |                            |       |         |
| 11-20mm                                          | 1.040        | 0.852                      | 1.270 | 0.6995  |
| 21-30mm                                          | 1.332        | 1.085                      | 1.635 | 0.0062  |
| 31-40mm                                          | 1.512        | 1.206                      | 1.895 | 0.0003  |
| 40+ mm                                           | 1.485        | 1.131                      | 1.949 | 0.0044  |
| Unknown                                          | 1.140        | 0.772                      | 1.685 | 0.5103  |
| Lymph node collection (reference <10)            | 0.865        | 0.769                      | 0.973 | 0.0161  |
| Major complication (reference = no)              | 1.067        | 0.887                      | 1.283 | 0.4934  |
| Length of stay                                   | 0.996        | 0.987                      | 1.006 | 0.4653  |
| 30-day readmission (reference = no)              | 1.176        | 0.962                      | 1.437 | 0.1137  |
| Pathologic stage (reference = I)                 |              |                            |       |         |
| II                                               | 1.715        | 1.448                      | 2.032 | <.0001  |
| III                                              | 1.741        | 1.377                      | 2.200 | <.0001  |

ADI, area deprivation index; BMI, body mass index; VATS, video-assisted thoracoscopic surgery

Multivariable model controlling for all covariates displayed in the table.

**e-Figure 1:** Overall Survival Based on Continued Smoking Status 1 Year After Surgical Treatment

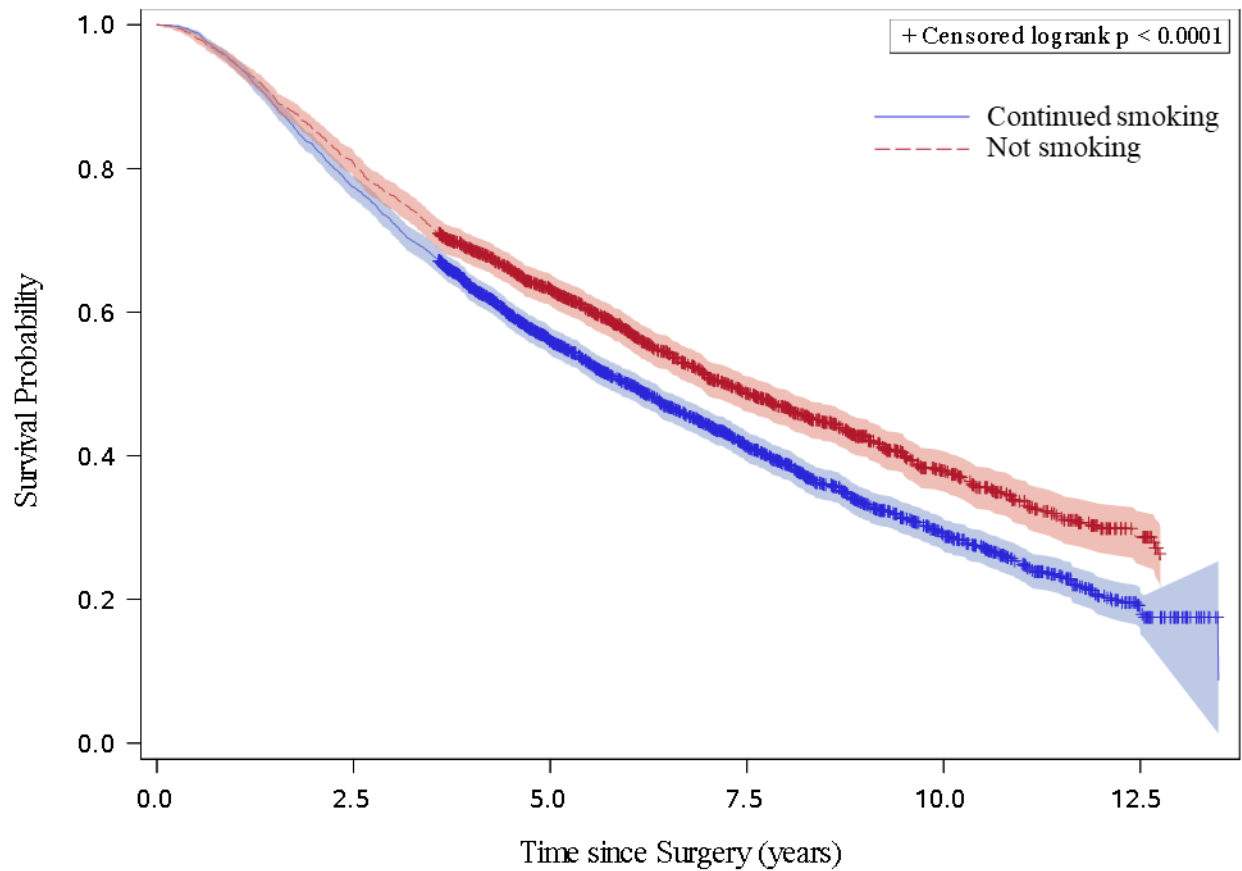



**e-Figure 2:** Overall Survival Based on Relapsed Smoking Status 1 Year After Surgical Treatment

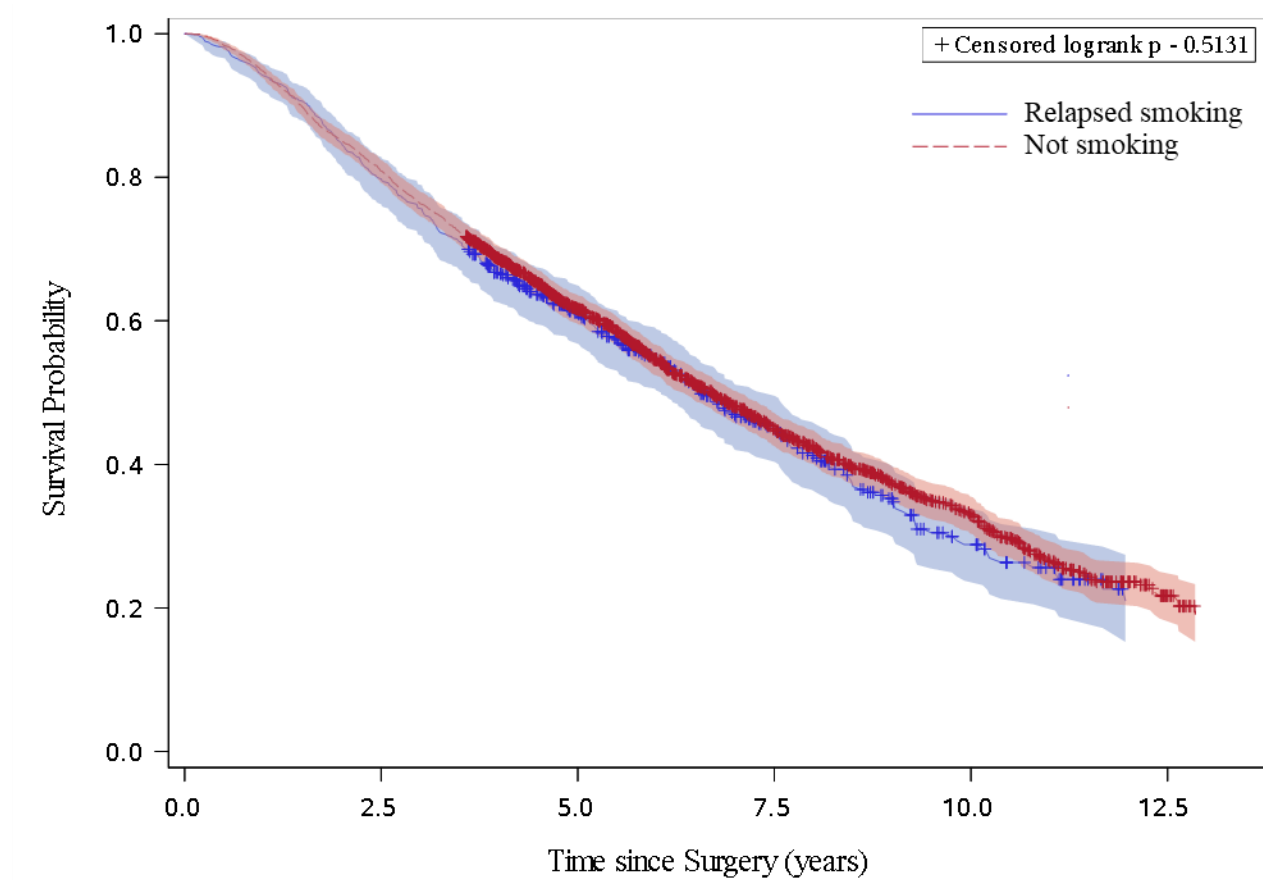

Supplement: mmc1.pdf [file mmc1.pdf]
